# Supplementary material for: Spatial distribution of isobaric androgens in target tissues using chemical derivatization and MALDI-2 on a trapped ion mobility quadrupole time-of-flight instrument
Source: Royal Society of Chemistry journal article supplement (doi:10.1039/d1ra06086d), 2021-01-01

**Electronic Supporting Information**  
**for**  
**Spatial Distribution of Isobaric Androgens in Target Tissues Using Chemical Derivatization and MALDI-2 on a Trapped Ion Mobility Quadrupole Time-of-Flight Instrument**

C.L. Logan Mackay<sup>1</sup>, Jens Soltwisch<sup>2</sup>, Bram Heijs<sup>3,4</sup>, Karl Smith<sup>5,&</sup>, Faye L. Cruickshank<sup>1</sup>, Annika Nyhuis<sup>6</sup>, Klaus Dreisewerd<sup>2</sup> and Diego Cobice<sup>5</sup>

<sup>1</sup> SIRCAMS, EastChem School of Chemistry, University of Edinburgh, Scotland, UK.

<sup>2</sup> Institute of Hygiene, University of Münster, Münster, Germany.

<sup>3</sup> Mass Spectrometry Imaging Group, Leids Universitair Medisch Centrum, Leiden, Netherlands

<sup>4</sup> Center for Proteomics & Metabolomics, Leiden University Medical Center, Leiden, Netherlands.

<sup>5</sup> Mass Spectrometry Centre, Biomedical Science Research Institute (BMSRI), Ulster University, Coleraine, Northern Ireland, UK.

<sup>6</sup> Bruker Daltonik GmbH & Co. KG, Bremen, Germany.

Corresponding author: Diego Cobice. [d.cobice@ulster.ac.uk](mailto:d.cobice@ulster.ac.uk), tel: +44(0)2892604456

<sup>&</sup> Current address: National High Magnetic Field Laboratory (NHFML), Tallahassee, FL, USA.

## ***Table of Content***

|                                 |           |
|---------------------------------|-----------|
| <b>1. Supplementary Methods</b> | <b>S2</b> |
| <b>2. Supplementary Figures</b> | <b>S5</b> |

## **1. Supplementary Methods**

### **1.1 Histological staining**

Cryosections were stained using haematoxylin and eosin. Tissue was fixated using cold acetone for 5 min, followed by a wash in sterile PBS (phosphate buffered saline) for 5 min. The sections were then dipped in haematoxylin for 20 s and placed under running water for bluing (15 min). Sections were then transferred to 0.25% eosin Y solution for 20 s, followed by five brief emersions in 100% ethanol and a 3 min wash in 95% ethanol. Stained tissue was mounted using Histoclear solution (NC9846201; Fisher Scientific International, Inc., Hampton, NH). Optical and magnified images of stained tissue were captured using an Epson V370 Photo scanner (Epson, Hemel Hempstead, UK) and a Zeiss Axio Scope.A1 (Zeiss, Jena, GmbH & Co K.G).

#### **APES coating of histology slides**

Briefly, 2% APES ((3-Aminopropyl) triethoxysilane in acetone) was used to immerse histology glass slides for 2 min, followed by two rinses in distilled H<sub>2</sub>O, and allowed to dry at RT.

### **1.2 Off-tissue derivatisation reaction screening**

Androgens working standards solutions (testosterone and DHEA) (10 ng/mL in methanol) were independently mixed in an Eppendorf tube with both Girard-T (0.1 mg/mL in 90:10 methanol: water (v/v) with 0.01 % trifluoroacetic acid (TFA) ) or Dansyl Hydrazine (DS) (0.1 mg/mL in 90:10 Methanol: water (v/v) with 0.01 % (TFA) at a molar 1:2 ratio of androgen to derivatisation reagent. Each reaction was left for 1 hour at 40 °C. The reaction solution was then mixed with a molar 1:1 ratio of CHCA matrix (5 mg/mL 60:40 ACN:H<sub>2</sub>O (v/v) + 0.1% formic acid (FA)) and spotted onto a scout 384 stainless-steel MALDI target plate using the dried-droplet method for MALDI-TIMS-tof analysis.

Androgen mix (T+DHEA) solutions were prepared by mixing standard working solutions of both steroids in a 1:1 (v/v) ratio (5 ng/mL, each). Reaction, matrix addition, and MALDI spotting were carried out using both GT and DS reagents as previously described.<sup>9</sup>

### 1.3 Confirmatory LC-MS/MS of androgens in tissue homogenate

Stock androgen standards (T+DHEA) and internal standard (IS,  $d_3$ -testosterone) were prepared in methanol, with all stock concentrations at 1 mg/mL, with 99.9% purity certification. A working calibration curve was created by spiking an ethanol/acetone (1:1, v/v) mixture, with a concentration ranging from 0.1 – 1000 pg/g. A working IS solution was prepared containing 1 ng/mL, with each calibration standard spiked with 10  $\mu$ L of working IS. Quality control (QC) standards were run using calibration points at 0.5 pg/g and 200 pg/g after 10 sample injections. All standards were stored at 2 – 8°C. This LC-MS/MS methodology was adapted from Cobice et al.<sup>9</sup> LNCaP tumour tissue (~50 mg) was homogenised in 700  $\mu$ L of ethanol/acetone mixture (1:1, v/v) using ultrasonication device (UP 50H, MMTG, place, state) for 1 min at an amplitude of 80%, and 0.5-0.9 s intervals in a 1.2 ml Eppendorf. 20  $\mu$ L of working internal standard at 1 ng/mL was spiked into the sample. The sample was kept in an ice bath during homogenisation. Then, 300  $\mu$ L of MiliQ water was added to the mixture, vortexed for 30 s, ultrasonicated for 10 min, and centrifuged for 10 min at 15,000 rpm. The supernatant (600  $\mu$ L) was taken and 10 mL of water was added prior to purification with a mixed-mode cation exchange cartridge (Oasis MCX 150 mg, 6 cc, Waters, Milton, MA). The cartridge was conditioned by loading with methanol and water (3 mL, each), then the sample was loaded and washed with 0.1 M HCl (1 mL) and water (3 mL). Androgens were eluted from the cartridge using acetonitrile/methanol (1:1, v/v, 4.5 mL). The supernatant was evaporated to dryness with nitrogen at RT and re-constituted in 200  $\mu$ L of 50:50 (v/v) Mobile phase A: B using a 250  $\mu$ L HPLC insert (1.5 ml HPLC amber vials). Samples were left at -20°C until LC/MS analysis. Homogenate samples were separated on a Luna PFP (50 x 2.1mm, 3.0  $\mu$ m) column (Phenomenex, place, UK) at 40 °C on an Agilent HP 1250 UHPLC system (Waldbronn, GmbH & Co K.G) using acetonitrile with 0.01% (v/v) formic acid as mobile phase B and water with 0.01% (v/v) formic acid as mobile phase A. Starting gradient conditions were 40% B with 0.35 mL/min flow rate. The mobile phase gradient used is displayed in **Table 1**.

**Table S1:** Mobile phase gradient conditions for tumour homogenate androgen analysis

| Time (min)  | Mobile phase B (%) |
|-------------|--------------------|
| 0 – 6.0     | 40                 |
| 6.0 – 12.1  | 90                 |
| 12.1 – 15.1 | 40                 |

Samples were kept at 5 °C and injection volume of sample was 10  $\mu$ L. Mass spectrometry analysis was carried out using positive mode electrospray ionisation on a AB Sciex 6500 QTrap (AB Sciex, Concord, Canada). Mass spectrometry settings were tuned for maximum ion intensities for all analytes. Ionization was performed with instrument settings as follows: Dwell

time 150 ms, Source temperature: 550 °C, Ion source gas 1: 50 psi, Ion source gas 2: 50, Curtain gas: 30 psi, CAD gas: 12 psi, Ion spray voltage: 5500 V. Data were acquired by MRM (multiple reaction monitoring) transitions are detailed in **Table S2**.

**Tables S2:** Mass Spectrometry conditions

| Androgen               | Parent<br>( <i>m/z</i> ) | Product<br>( <i>m/z</i> ) | CE (V) <sup>1)</sup> | DP (V) <sup>1)</sup> | CXP (V) <sup>1)</sup> | EP (V) <sup>1)</sup> |
|------------------------|--------------------------|---------------------------|----------------------|----------------------|-----------------------|----------------------|
| T                      | 289.2                    | 109.0                     | 33                   | 90                   | 10                    | 8                    |
| DHEA                   | 289.2                    | 109.0                     | 35                   | 85                   | 10                    | 5                    |
| d <sub>3</sub> -T (IS) | 292.2                    | 109.0                     | 41                   | 80                   | 10                    | 9                    |

<sup>1)</sup> CE: Collision energy, DP: Declustering potential, CXP: Exit potential, EP: Entrance potential.

## 2 Supplementary Figures

**Figure S1:** Androgen Girard-T and Dansyl hydrazine derivatization reaction scheme

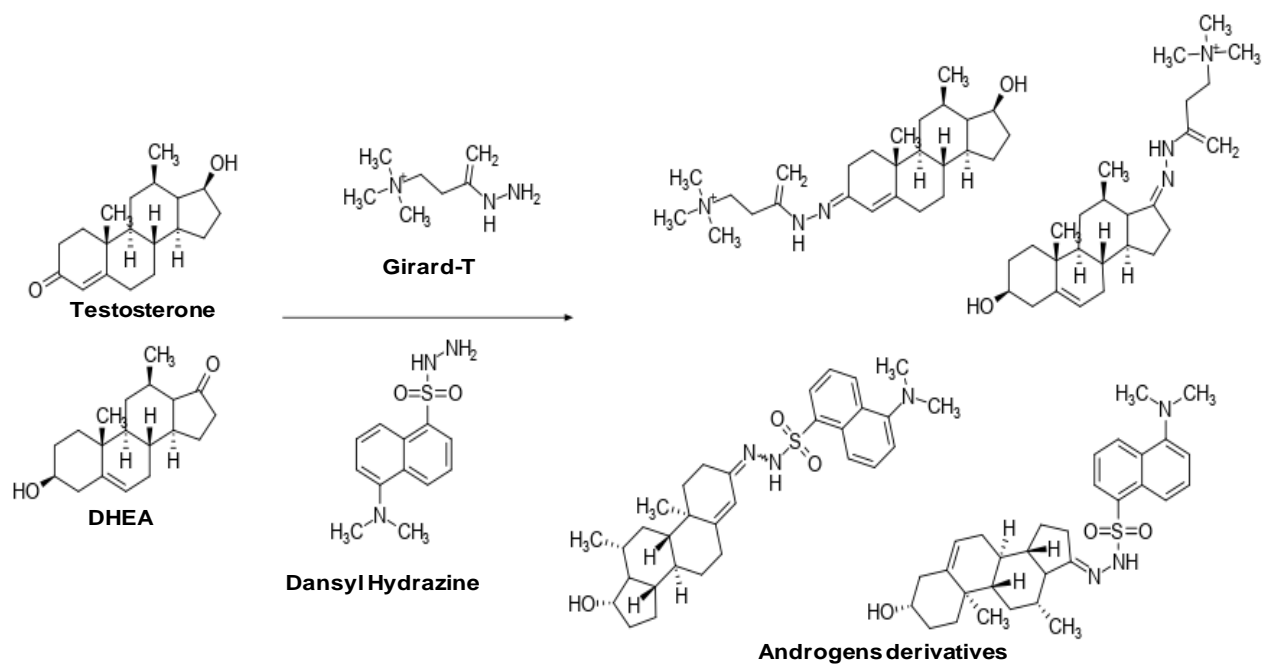

**Figure S2:** Representative off-tissue MALDI-TIMS-tof (10 scans accumulation) spectra of **a)** Girard-T testosterone derivative **b)** Girard-T DHEA derivative **c)** Dansyl hydrazine testosterone derivative **d)** Dansyl hydrazine DHEA derivative.

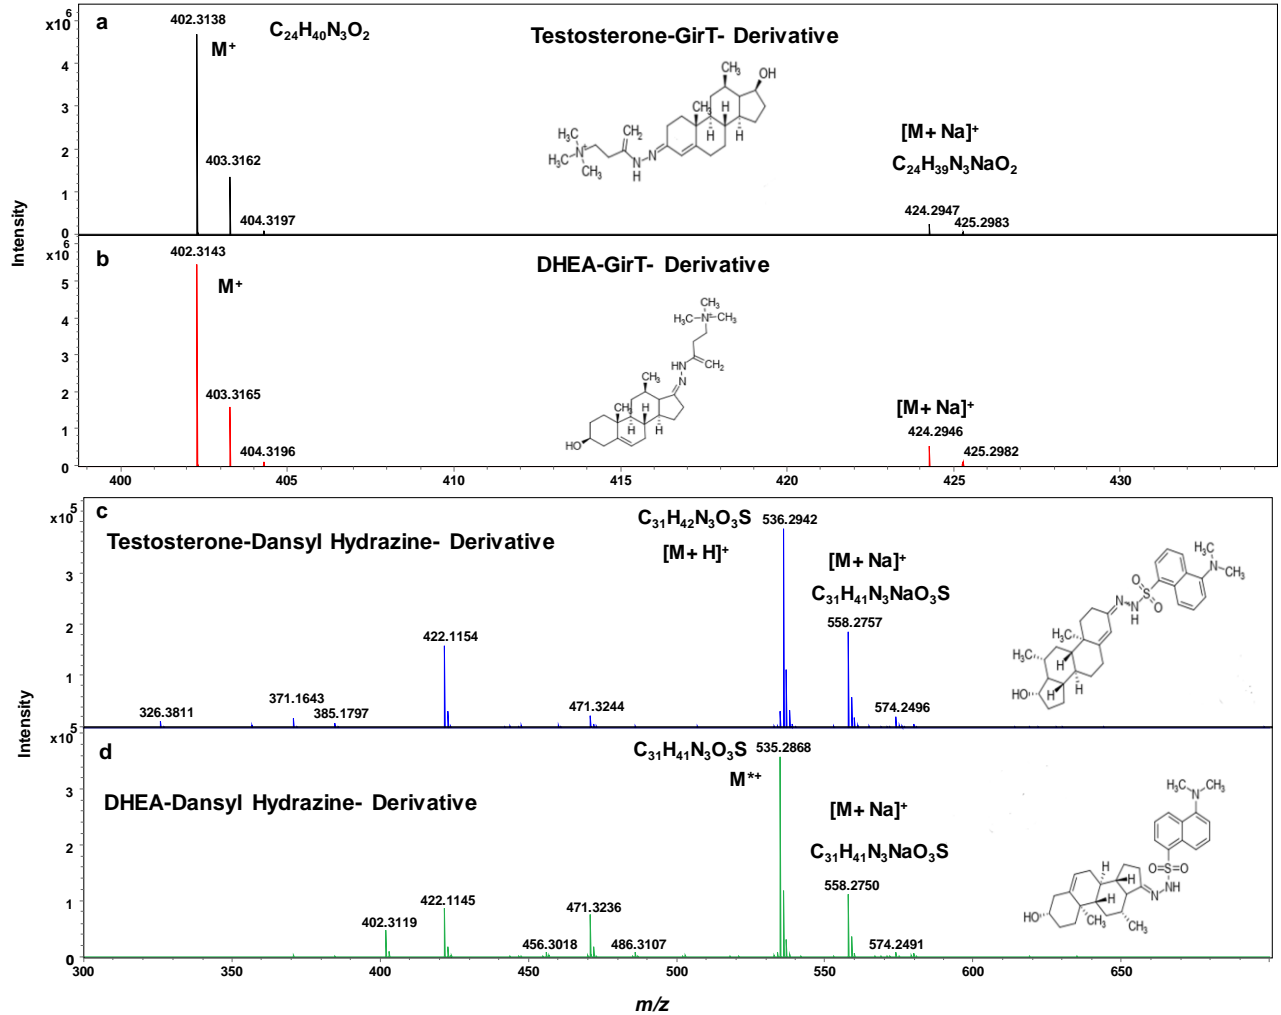

**Figure S3:** Representative off-tissue MALDI-TIMS-tof (10 scans accumulation) mobilograms of Girard-T testosterone derivative **a**) at its protonated mass **b**) at its sodium adduct. Girard-T DHEA derivative **c**) at its protonated mass **d**) at its sodium adduct. Equimolar solution of testosterone and DHEA Girard-T derivatives (5 ng/mL/each) at **e**) their protonated mass **f**) at their isobaric sodiated adduct **g**) Representative spectrum of equimolar solution of Girard-T derivatives (100 ng/mL/each)

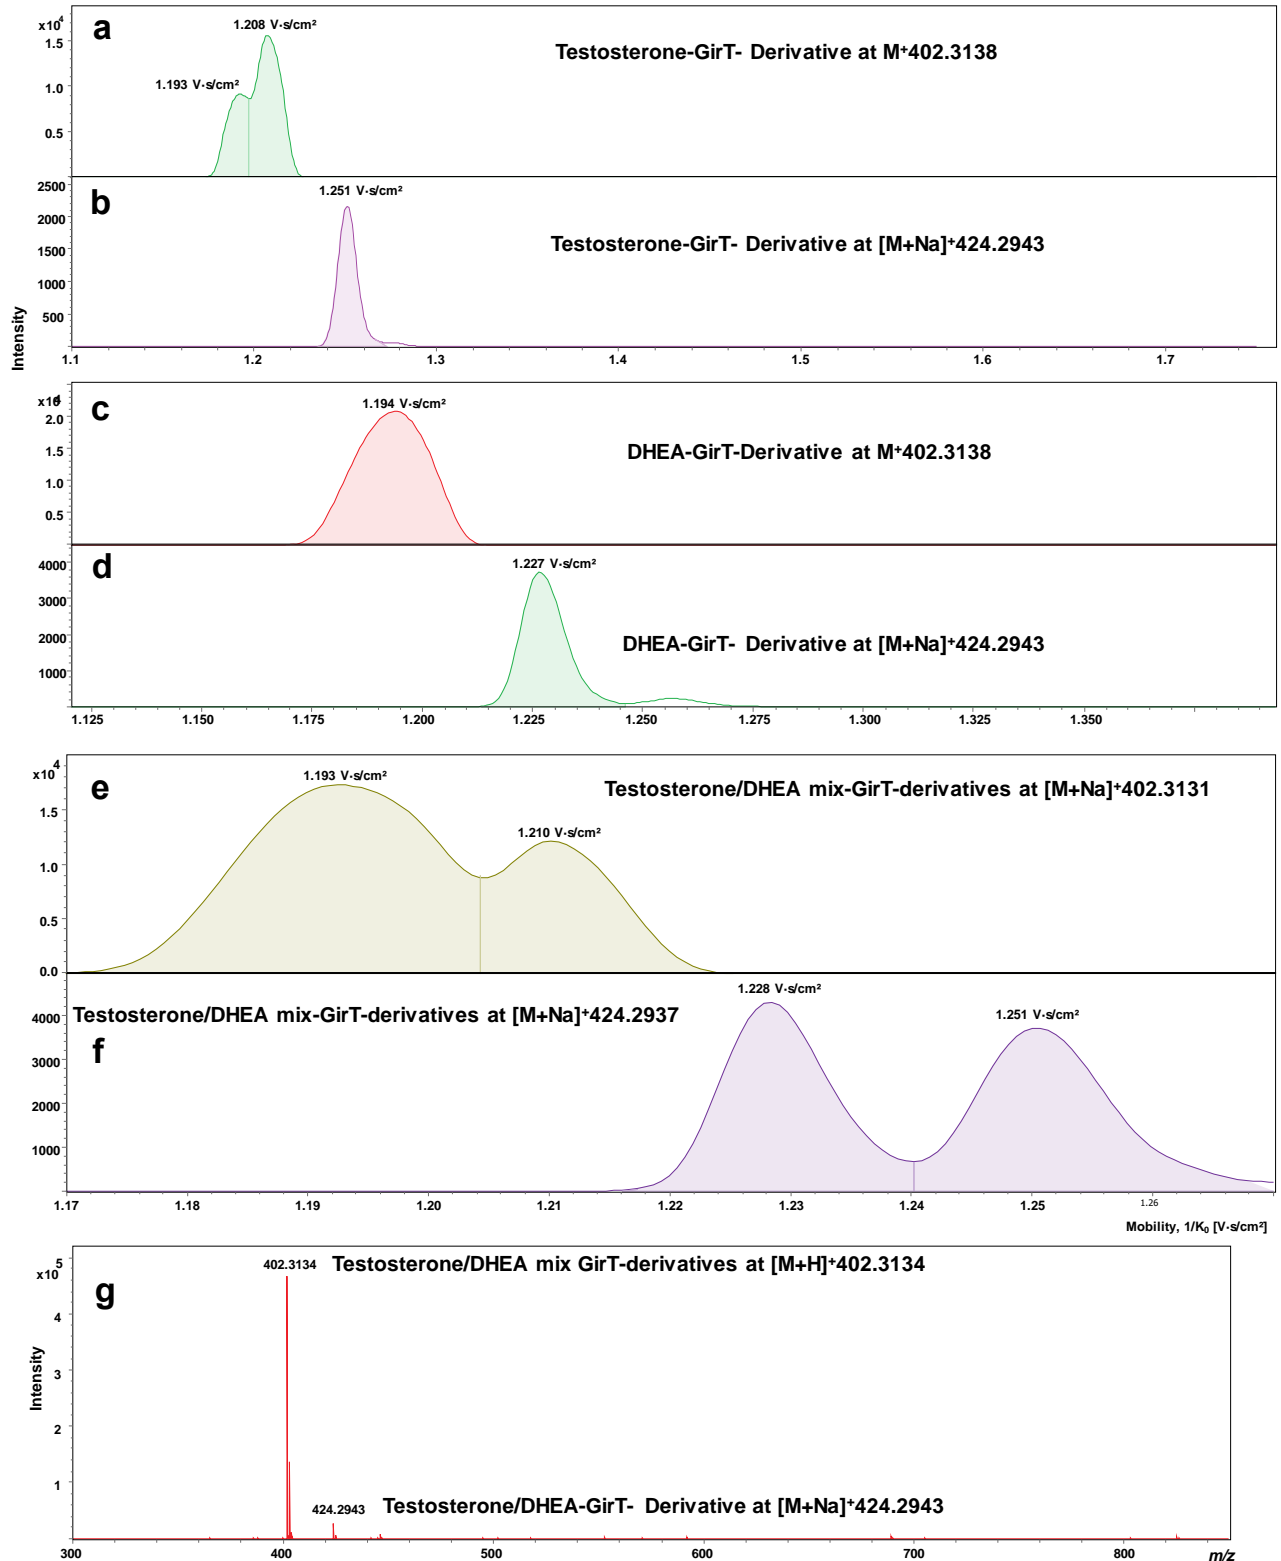

**Figure S4:** Representative off-tissue MALDI-TIMS-tof (10 scans accumulation) mobilograms of Dansyl-testosterone derivative **a**) at its protonated mass **b**) at its sodium adduct. Dansyl- DHEA derivative **c**) at its radical ion **d**) at its sodium adduct. Equimolar solution of dansyl testosterone and DHEA derivatives (5 ng/mL, each) **e**) at the protonated mass for testosterone **f**) at radical ion for DHEA **g**) at their isobaric sodiated adduct **h**) Representative off-tissue MALDI-TIMS-tof (10 scans accumulation) spectrum of dansyl testosterone + DHEA equimolar solution (100 ng/ml/each)

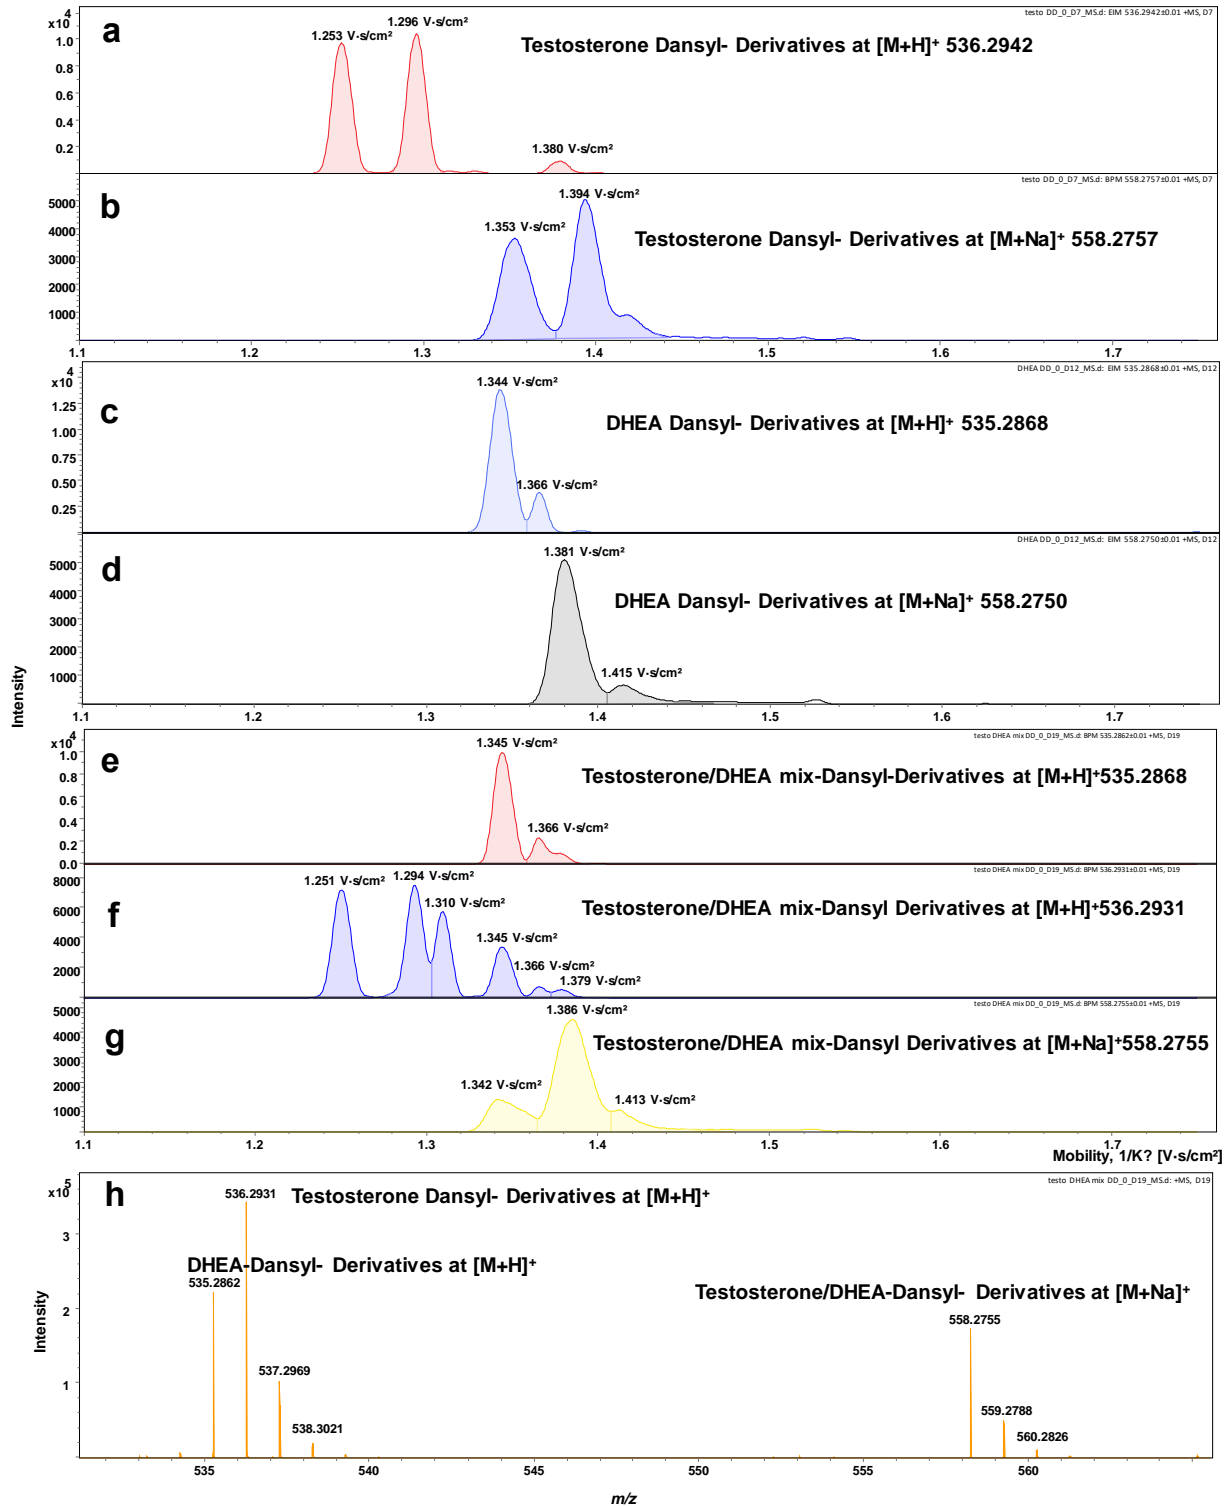



**Figure S5:** Quantitative and confirmatory LC-MS/MS analysis of testosterone and DEHA in LNCaP xenograph tumour. Tumour tissue homogenate was assessed for androgens levels a) Representative LC/MS/MS chromatogram of the targeted androgens in tissue homogenate sample.

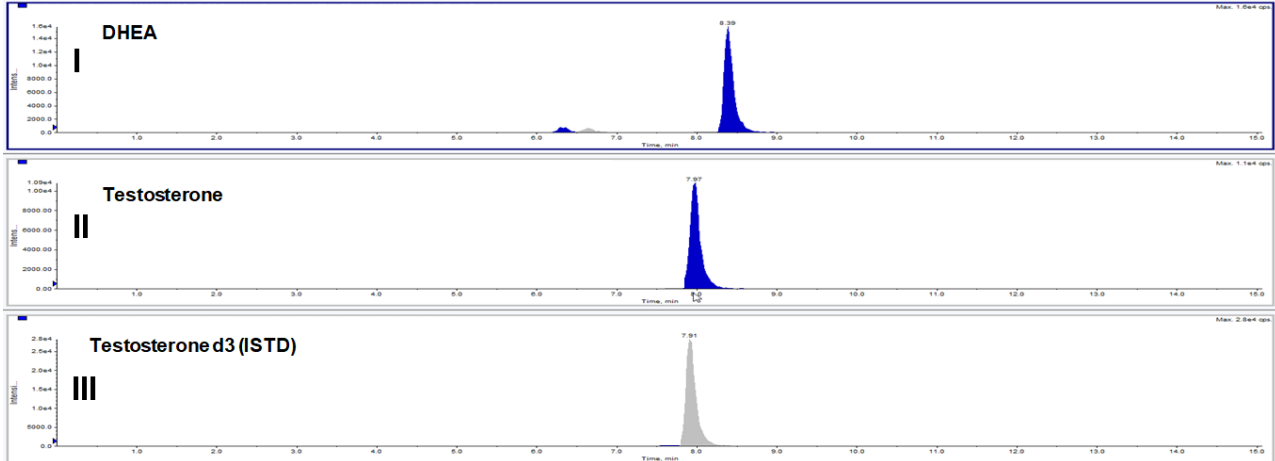

Supplement: d1ra06086d1.pdf [file d1ra06086d1.pdf]
